# Supplementary material for: An Evolutionary Conserved Role for Anaplastic Lymphoma Kinase in Behavioral Responses to Ethanol
Source: PLoS One. 2011 Jul 22;6(7):e22636. doi: 10.1371/journal.pone.0022636 (PMC3142173; doi:10.1371/journal.pone.0022636)
Supplement: Table S1 — Transcripts showing significantly altered expression in dLmo mutants EP1306 and BxJ . Columns (from left to right) indicate the Affymetrix probe set identifier, the gene symbol, the FlyBase annotation, the cluster number from HOPACH clustering, the mean expression value of the transcript (normalized to expression in control w;iso flies and expressed as log2) in flies carrying the BxJ and EP1306 mutations, and the ANOVA p-value. (XLS) [file pone.0022636.s004.xls]

## Sheet: Sheet1
Probe Set ID	Symbol	Flybase Annotation	Cluster Number	BxJ Mean (Log2)	EP1306 Mean (Log2)	p-value ANOVA (BxJ-Ep1306-w;iso comparison)
1633919_s_at	l(3)mbn	CG12755-RA	1	-0.589243	0.182439	0.024999
1628709_at	NA	HDC08233	1	-0.710863	0.199725	0.0111333
1639907_at	CG11951	CG11951-RA	1	-0.757918	0.00953772	0.0440387
1641117_a_at	CG17600	CG17600-RA	1	-0.567899	0.0331322	0.0181293
1623944_at	CG12605	CG12605-RB	1	-0.421873	0.0959362	0.0413264
1636615_at	elav	CG4262-RA	1	-0.836413	-0.0836306	0.0453796
1636587_at	CG7288	CG7288-RA	1	-0.583796	-0.0390649	0.0451113
1631676_at	CG4467	CG4467-RA	1	-0.714939	-0.0216725	0.0283263
1637162_at	CG12054	S.C3R003628	1	-0.588194	-0.07767	0.0087979
1639223_a_at	sr	CG7847-RA	1	-0.642907	-0.0566162	0.0210513
1640850_at	CG31012	CG31012-RA	1	-0.558133	0.0804208	0.043771
1633370_s_at	CG11727	GH08923	1	-0.659039	-0.0829333	0.0175328
1634099_at	rdgB	CG11111-RA	1	-0.383547	0.118953	0.00371486
1626638_at	CG31864 /// CG5202	CG5202-RA	1	-0.444492	0.0663889	0.00223044
1634742_at	Sodh-2	CG4649-RA	1	-1.46122	0.279247	1.0524e-05
1640122_at	NA	CG1844-RA	1	-1.11702	0.157077	1.53887e-05
1635251_at	CG32553	CG32553-RA	1	-1.9791	0.219617	1.61342e-05
1625732_at	NA	CG32600-RA	1	-0.750139	-0.0172064	0.00194638
1635592_at	vav	CG7893-RB	1	-1.7975	0.0890534	1.97484e-05
1636576_s_at	norpA	CG3620-RB	1	-0.519391	0.025412	0.000168143
1626781_at	Pp2B-14D	CG9842-RA	1	-1.16882	-0.0881853	4.64197e-05
1623793_at	krz	CG1487-RA	1	-1.06772	0.0243767	0.015579
1634678_at	CG13108	CG13108-RA	1	-0.508277	-0.00571105	0.0215786
1632131_at	5-HT7	CG12073-RA	1	-0.646482	-0.267086	0.0411874
1639207_at	CG14216	CG14216-RA	1	-0.656211	-0.288464	0.0437622
1627506_at	ed	CG12676-RA	1	-0.598519	-0.157282	0.0115691
1635933_at	CG4496	CG4496-RA	1	-0.534848	-0.281462	0.0453525
AFFX-Dros-18S_rRNA_3_at	NA	NA	1	-2.88597	-1.63343	0.0213747
AFFX-Dros-18S_rRNA_5_at	NA	NA	1	-2.45545	-1.43082	0.0302341
1625446_at	CG32763	CG32763-RA	1	-0.827166	-0.715686	0.0133952
1641746_at	CG2555	CG2555-RA	1	-0.930203	-0.480914	0.0232963
1626678_at	CG7135	CG7135-RA	1	-0.60729	-0.501556	0.00386794
1628388_at	CG3823	CG3823-RA	1	-0.54456	-0.429617	0.0286229
1639605_at	CG13290	CG13289-RA	1	-0.513077	-0.484663	0.02314
1641265_at	tty	CG1693-RA	1	-0.691507	-0.468877	0.00560801
1634670_at	CG32714	CG32714-RA	1	-0.649355	-0.445359	0.00813897
1641367_at	NA	CG31685-RA	1	-0.787101	-0.349055	0.034205
1630079_at	Atu	CG1433-RA	1	-0.618869	-0.181469	0.01587
1634083_at	NA	CG8318-RB	1	-0.538641	-0.259143	0.0355476
1638683_at	NA	HDC17231	1	-0.61937	-0.270329	0.0400761
1631327_at	mspo	CG10145-RA	1	-0.52241	-0.0938908	0.0234977
1632791_at	CG32479	CG32479-RA	1	-0.520304	-0.144211	0.0134101
1624719_at	CG10777	CG10777-RB	1	-0.517782	-0.197263	0.0276538
1633081_at	CG14616 /// CG14617	CG14616-RD	1	-0.506212	-0.166197	0.0177229
1635840_s_at	msl-2	CG3241-RB	1	-0.590289	-0.0661612	0.00303692
1638428_at	NA	Transposon.33	1	-0.866464	-0.327418	0.00645473
1636614_a_at	vav	CG7893-RA	1	-0.505359	-0.117984	0.0231212
1626866_at	NA	CT34017	1	-0.75324	-0.22269	0.00360278
1629388_s_at	CG7950	CG7950-RA	1	-0.537803	-0.185611	0.00237866
1625026_at	CG3348	CG3348-RA	1	-0.706831	-0.157615	0.000484121
1636888_a_at	Aph-4	CG1462-RA	1	-0.909469	-0.215916	1.27816e-05
1624688_at	CG9360	CG9360-RA	1	-1.10986	-0.551275	0.000925499
1629242_x_at	NA	Transposon.33	1	-0.976191	-0.322163	0.000557821
1634146_at	NA	CG15926-RA	1	-0.608241	-0.126493	0.00197154
1627455_at	CG4448	CG4448-RA	1	-0.661991	-0.241487	0.0394931
1637076_at	CG8861	CG8861-RA	1	-0.51643	-0.316806	0.00565783
1637257_at	NA	CG9009-RA	1	-0.738146	-0.425454	5.06097e-05
1626426_at	CG11155	CG11155-RA	1	-0.689227	-0.2712	0.000274462
1627821_s_at	Syt7	CG2381-RB	1	-1.14956	-0.292894	0.000376781
1640906_at	CG32523	CG32523-RA	1	-1.4477	-0.471463	3.33983e-05
1633852_at	NA	CG4396-RA	1	-0.750318	-0.245264	0.00367522
1628358_at	Tob	CG9214-RA	1	-0.522499	-0.116899	0.0348615
1635005_a_at	Rdl	CG10537-RA	1	-0.670455	-0.342662	0.0361916
1626996_s_at	br	CG11491-RC	1	-0.753719	-0.540678	0.024081
1625602_at	NA	S.CX000437	1	-0.566701	-0.570311	0.0174596
1629874_at	Kif3C	CG17461-RA	1	-0.507925	-0.269329	0.0336254
1632494_at	Grip163	CG5688-RA	1	-1.45072	-0.931407	0.0090001
1638328_at	NA	S.C3R003006	1	-0.650538	-0.409052	0.0153552
AFFX-r2-Ec-bioB-3_at	NA	NA	1	-2.32144	-1.59128	0.0351362
AFFX-CreX-5_at	NA	NA	1	-1.02035	-0.86903	0.0391615
AFFX-r2-Ec-bioB-M_at	NA	NA	1	-1.70301	-1.66006	0.0238867
AFFX-BioDn-5_at	NA	NA	1	-1.60195	-1.42831	0.0286889
AFFX-r2-Ec-bioD-3_at	NA	NA	1	-1.42737	-1.19364	0.040179
AFFX-BioC-3_at	NA	NA	1	-1.5443	-1.44671	0.0315925
AFFX-BioB-5_at	NA	NA	1	-1.6366	-1.47377	0.0286623
1628679_at	Snm1	CG10018-RA	1	-0.789564	-0.751774	0.0210057
1624674_at	CRMP	CG1411-RD	1	-0.935084	-0.755786	0.0318552
AFFX-Dm-M15077-1_at	NA	NA	1	-0.537129	-0.419679	0.0141216
1638401_at	CG13589	CG13589-RA	1	-0.556896	-0.484936	0.00637804
1632845_at	Hr39	CG8676-RC	1	-0.60169	-0.445902	0.0475254
1639021_at	NA	S.CX001038	1	-0.898756	-0.702888	0.00956185
1624220_s_at	NA	HDC03386	1	-1.07543	-0.85368	0.00643023
1632553_at	NA	HDC12109	1	-0.604704	-0.501365	9.60096e-05
1639396_s_at	CDase	CG1471-RB	1	-0.587657	-0.392242	0.000343031
1639729_s_at	NA	Transposon.35	1	-1.14724	-0.996852	0.000869735
1640626_at	CG32387	CG32387-RB	1	-0.47236	-0.525879	0.0285763
1639926_at	CG9395	CG9395-RA	1	-0.634102	-0.742171	0.0239081
1623984_s_at	MICAL	CG33208-RB	2	-0.277866	-0.841847	0.0187655
1638327_a_at	CG17754	CG17754-RC	2	-0.127854	-0.524886	0.0210529
1624859_at	NA	CG4319-RA	2	-0.155239	-0.917242	0.0242015
1639014_at	CG5404	CG5404-RA	2	-0.228713	-0.718488	0.0449755
1624425_at	CG7384	CG7384-RA	2	-0.114631	-0.964642	0.0247249
1638768_at	CG2560	CG2560-RA	2	0.0104664	-0.826112	0.0316369
1631112_at	Epac	CG3427-RA	2	-0.0507112	-0.520991	0.00669256
1638722_at	CG16807	CG16807-RA	2	-0.057086	-0.592758	0.0321605
1625644_at	CG2641	CG2641-RA	2	0.135981	-1.49603	0.0118555
1631127_at	CG10424	CG10424-RA	2	0.0349589	-0.648391	0.0101729
1625053_at	CG16898	CG16898-RA	2	-0.0691631	-0.957487	0.0135225
1623103_at	CG14946	CG14946-RA	2	-0.120521	-0.522189	0.0406654
1628107_at	CG3513	CG3513-RA	2	-0.251525	-1.00511	0.00811309
1634466_at	CG9507	CG9507-RA	2	-0.190414	-0.652189	0.00150395
1628099_at	bor	CG6815-RA	2	-0.170625	-0.5342	0.0139413
1623960_s_at	NA	Transposon.40	2	-0.411	-0.905941	0.0118655
1625195_s_at	shn	Transposon.24	2	-0.236354	-0.544457	0.0212798
1627943_at	NA	CG14167-RA	2	-0.257991	-0.664271	0.00349304
1640870_s_at	CG17322	CG17322-RD	2	-0.151501	-1.00789	0.00532862
1634633_s_at	NA	Transposon.54	2	-0.535942	-2.36898	0.000134166
1640242_s_at	NA	Transposon.42	2	-0.340616	-1.17059	0.000396606
1628406_s_at	NA	RH61266	2	-0.333494	-0.904859	0.00115681
1625688_at	CG6293	CG6293-RA	2	-0.161214	-0.666714	0.0032574
1623624_at	CG6107	CG14869-RA	2	0.0545546	-0.504497	0.00254274
1630365_at	CG3563	CG3563-RA	2	-0.0401295	-0.647744	0.014685
1634471_at	CG33214	CG33214-RA	2	-0.189552	-0.571057	0.00498294
1638016_at	CG2993	CG2993-RA	2	-0.263275	-1.08764	0.00338652
1629803_a_at	NA	CG8095-RB	2	-0.207621	-0.906264	0.0030494
1623971_at	CG9150	CG9150-RA	2	-0.312904	-2.32614	0.000304232
1626700_at	Act88F	CG5178-RA	2	-0.038788	-0.82894	0.000196956
1637151_at	mre11	CG16928-RA	2	-0.075297	-0.733284	0.0013984
1639130_a_at	kkv	CG2666-RA	2	-0.0545095	-0.534871	0.000454624
1629569_at	CG1839	CG1839-RA	2	-0.482923	-2.30706	3.69435e-07
1624819_s_at	NA	Transposon.17	2	-0.256537	-1.57272	0.00209827
1627236_s_at	NA	HDC03384	2	-0.37278	-2.61573	8.76262e-05
1636431_at	CG8768	CG8768-RA	2	-0.151985	-1.16725	0.000178041
1641270_at	CG8745	CG8745-RA	2	-0.160625	-0.782157	0.00143316
1624745_at	NA	HDC09365	2	-0.119612	-0.631027	0.00261472
1625197_at	eIF-5C	CG2922-RA	2	-0.0398465	-0.632535	0.000547491
1626665_at	CG7408	CG7408-RB	2	0.0488761	-0.902401	0.00122894
1625967_s_at	l(3)10615	CG16765-RA	2	0.022486	-0.482162	0.00240815
1637391_at	CG9299	CG9299-RA	2	0.055478	-1.05745	0.000414462
1625600_a_at	Asph	CG8421-RE	2	-0.00754644	-1.31951	0.000104334
1639180_at	CG12505	CG12505-RA	2	0.0316127	-1.55576	6.40117e-05
1639980_s_at	Mlp84B	CG1019-RA	2	0.0346955	-0.747254	1.04489e-05
1638469_s_at	CG3857	Transposon.36	2	-0.0287142	-1.02675	1.9126e-06
1629019_s_at	CG13551	CG13551-RA	2	0.00145218	-2.90471	5.91116e-09
1637144_a_at	Map205	CG1483-RA	2	0.00452647	-5.01075	5.24158e-07
1630614_s_at	NA	HDC11981	2	-0.560839	-2.96407	4.47715e-06
1635886_s_at	NA	Transposon.38	2	-0.352978	-2.00569	3.83236e-06
1639968_at	CG12797	CG12797-RA	2	-0.0874815	-0.66023	0.000106116
1623710_at	CG5847	CG5847-RA	2	-0.165399	-0.778383	0.0258491
1627632_at	CG17777	CG17777-RA	2	0.00263854	-0.659588	0.0147916
1633446_s_at	CG6981	CG6981-RB	2	-0.138987	-0.591282	0.00259101
1638959_at	CG8501	CG8501-RA	2	-0.162957	-0.89795	0.02913
1630986_s_at	Adk3	CG6612-RB	2	-0.0279438	-0.513995	0.00568269
1626949_at	CG11158	CG11158-RA	2	-0.0305277	-2.50084	0.000171246
1627637_at	d	CG10595-RA	2	-0.110737	-0.508872	0.0202253
1634418_at	CG15407	CG15407-RB	2	-0.291563	-1.63023	0.019586
1624011_at	CG9295	CG9295-RB	2	-0.38868	-1.29745	0.0153454
1634165_at	CG11378	CG11378-RA	2	-0.0922979	-0.50694	0.0186809
1629614_at	CG31549	CG31549-RA	2	-0.101007	-0.660902	0.0177895
1631405_at	CG9508	CG9508-RA	2	-0.19014	-0.987978	0.00738901
1637077_s_at	CG3777	CG3777-RB	2	-0.0247565	-0.52114	0.0140836
1631420_at	CG9509	CG9509-RA	2	-0.0481335	-2.43101	0.00310132
1636423_at	NA	CG8012-RA	2	-0.012442	-0.512517	0.00219542
1640489_at	CG18522	CG18522-RA	2	-0.023361	-1.32069	0.00167294
1638612_at	CG11142	CG11142-RA	2	-0.117446	-0.56345	0.0473146
1632652_s_at	CG30022	CG40100-RA	2	-0.0413474	-0.855682	0.00686511
1640295_a_at	RhoGAP71E	CG32149-RB	2	-0.0452686	-0.526134	0.00827041
1625141_at	NA	CG14715-RA	2	0.0173167	-1.1098	0.000389751
1625965_a_at	CG1148	CG1148-RB	2	-0.0718611	-1.88278	4.99596e-05
1633809_at	CG13046	CG13046-RA	2	-0.0962524	-2.17256	3.2667e-05
1626910_at	CG15282	CG15282-RA	2	0.00894984	-0.548788	0.00167331
1625042_at	CG31288	CG31288-RA	2	-0.162277	-1.22013	0.00882928
1633914_at	CG9092	CG9092-RA	2	-0.0343679	-0.977	0.00130862
1628261_at	CG13067	CG13067-RA	2	-0.0700098	-1.15524	0.000516496
1626970_at	NA	CG6649-RA	2	-0.158176	-1.53158	7.42391e-05
1636647_s_at	NA	CG40160-RA	2	-0.152557	-0.668553	0.000418877
1638276_at	Obp56e	CG8462-RA	2	-0.140858	-0.570881	0.00144806
1635593_at	Cyp6d2	CG4373-RA	2	-0.143016	-1.20705	0.00192612
1623675_at	NA	CG7592-RA	2	-0.336327	-2.47704	0.000553228
1626324_at	Cyp309a1	CG9964-RA	2	-0.606117	-3.41739	0.000325361
1628699_at	Lsp1	CG4178-RA	2	-0.467552	-3.40839	0.000139691
1626133_s_at	NA	GH06606	2	-0.120435	-1.09681	0.000220461
1641307_at	CG14419	CG14419-RA	2	-0.0764205	-0.701458	0.000196718
1623087_at	NA	CG32239-RA	2	-0.195981	-0.541682	0.00619753
1630669_at	NA	CG7299-RA	2	-0.132375	-0.500203	0.00250228
1639495_at	Cyp9b1	CG4485-RA	2	-0.358797	-0.683689	0.0449218
1634019_at	CG2064	CG2064-RA	2	-0.283214	-1.13519	0.0123642
1638053_at	Cyp4p1	CG10842-RA	2	-0.25926	-0.776614	0.00436706
1633503_at	CG12171	CG12171-RA	2	-0.467943	-1.28927	0.00340224
1638182_at	CG5999	CG5999-RA	2	-1.43731	-3.24772	0.00991209
1631280_at	CG9095	CG9095-RA	2	-0.248057	-0.623225	0.00257254
1623438_at	CG9505	CG9505-RA	2	-0.561598	-1.19438	0.041091
1630034_at	CG12119	CG12119-RA	2	-0.285533	-0.54996	0.0132845
1628563_at	CG33181	CG33181-RA	2	-0.334558	-0.65433	0.0373863
1627899_at	NA	RE31004	2	-0.435134	-0.898704	0.00607189
1641729_at	NA	CG13043-RA	2	-0.236988	-0.753989	0.0141932
1636046_at	NA	CG32499-RA	2	-0.338219	-0.55364	0.0103273
1634455_at	CG14406	CG14406-RA	2	-0.654783	-0.964588	0.0070255
1636566_at	NA	CG32368-RA	2	-0.412441	-0.712106	0.00602701
1633706_at	CG7714	CG7714-RA	2	-0.306581	-0.730996	0.00600654
1629747_at	CG8511	CG8511-RA	2	-0.251888	-0.522721	0.000882539
1637826_at	CG10623	CG10623-RA	2	-0.218246	-0.526465	0.000973639
1632339_s_at	cher	CG3937-RA	2	-0.181296	-0.51989	0.0202897
1634546_at	Tig	CG11527-RA	2	-0.310449	-0.863485	0.00191734
1625583_at	CG16926	CG16926-RA	2	-1.46839	-2.72139	0.000435332
1633989_at	CG1124	CG1124-RA	2	-0.329155	-0.735433	0.000182899
1623747_at	CG5895	CG5895-RA	2	-0.213281	-0.560271	0.000116514
1626966_s_at	NA	Transposon.82	2	-0.431069	-1.03692	2.8831e-05
1631874_at	NA	CG40295-RA	2	-0.756662	-1.39917	3.21863e-06
1637246_a_at	CG32627	CG32627-RA	2	-0.253561	-0.706736	0.00025459
1640350_at	fau	CG6544-RA	2	-0.26393	-0.689506	0.000511449
1627511_at	charybde	CG7533-RC	2	-0.413768	-0.636123	0.0181762
1635500_a_at	pros	CG17228-RA	2	-0.4128	-0.60107	0.00337875
1634131_s_at	Mnt	CG13316-RC	2	-0.484215	-0.594021	0.0139939
1634256_a_at	CG11566	CG32514-RA	2	-0.579772	-0.699513	0.0109643
1630538_at	NA	CG30163-RA	3	-0.370723	0.163247	0.0468067
1635679_at	lab	CG1264-RA	3	-0.348539	0.246661	0.0487711
1627118_at	CG12855	CG12855-RA	3	-0.39647	0.294957	0.0135203
1638110_at	NA	CG40467-RA	3	-0.354021	0.166542	0.00545322
1634436_at	NA	CG14919-RA	3	-0.393926	0.193878	0.00426876
1631030_at	NA	CG17023-RA	3	-0.356911	0.182578	0.000898497
1628430_at	NA	CG15704-RA	3	-0.350641	0.241313	0.0138964
1634134_at	CG6114	CG6114-RA	3	-0.346732	0.24426	0.0289533
1630827_s_at	NA	CR_tc_LD11130	3	-0.258036	0.270988	0.0460927
1640524_at	GC	CG13927-RA	3	-0.340165	0.178495	0.0360237
1623209_at	CG8833	CG8833-RA	3	-0.264715	0.271263	0.00375434
1631512_at	CG9377	CG9377-RA	3	-1.08452	0.427015	2.77059e-05
1633971_at	CG31036	CG31036-RA	3	-0.736017	0.526206	0.000601222
1629281_at	NA	CG6539-RA	3	-0.517238	0.448462	0.0040724
1639366_at	Hr38	CG1864-RC	3	-0.275492	0.249651	0.00690999
1641146_at	st	CG4314-RA	3	-0.351253	0.376427	0.0417307
1633540_at	NA	CG8147-RA	3	-0.48718	0.670031	0.0491033
1636695_at	Pk17E	CG7001-RA	3	-0.331924	0.32087	0.0211424
1625522_at	CG32551	CG32551-RA	3	-0.192807	0.311888	0.0184655
1627134_at	ApepP	CG6291-RA	3	-0.160488	0.655405	0.00449507
1638301_at	CG8157	CG8157-RA	3	-0.248407	0.641828	0.000299465
1623612_at	CG7722	CG7722-RA	3	-0.304567	0.662617	0.00821786
1641454_at	CG1461	CG1461-RA	3	-0.300662	0.732456	0.00129131
1631631_at	CG13222	CG13222-RA	3	-0.200364	0.454318	0.00372957
1639594_at	NA	CG40485-RB	3	-0.224191	0.277913	0.000500583
1623376_s_at	Nmda1	CG3798-RF	3	-0.256368	0.418693	0.00265882
1638700_at	Alk	CG8250-RA	3	-0.210248	0.329474	0.0154183
1641450_s_at	NA	Transposon.26	3	-0.658012	0.967252	0.00666274
1623508_at	CG30466	CG30466-RA	3	-0.410519	0.595058	0.0254559
1627334_at	Tsp39D	CG8666-RA	3	-0.236244	0.385314	0.0237921
1631137_at	viaf1	CG18593-RA	3	-0.180095	0.404396	0.0179514
1631055_at	Pka-C1	CG4379-RB	3	-0.316049	0.471989	0.00520713
1629496_at	CG7832	CG7832-RA	3	-0.364625	0.680718	5.04956e-05
1641134_at	CG7277	CG7277-RA	3	-0.253321	0.340724	0.00068448
1623251_at	CG14450	CG14450-RA	3	-0.204516	0.363378	0.0117721
1629804_s_at	CG6329	CG6329-RC	3	-0.19595	0.478107	0.000312482
1636833_at	CG17364	CG17364-RB	3	-0.416486	1.29056	0.00243192
1630883_at	NA	Dm.4.48518.0	3	-0.382654	0.977386	0.00210684
1631215_at	CG32132	CG32132-RA	3	-0.351667	0.819539	0.00453515
1638687_at	NA	CG40298-RA	3	-0.305166	0.559195	5.54219e-06
1636758_s_at	CG12822 /// CG18853	CG11205-RA	3	-0.198186	0.341656	6.99276e-05
1629417_s_at	CG14853	CG14853-RB	3	-0.50101	1.16371	8.32559e-05
1633998_s_at	NA	Transposon.47	3	-0.261142	0.599894	8.83336e-05
1625695_at	Ets98B	CG5583-RA	4	0.152764	0.569297	0.0395655
1624798_s_at	G49B	CG17759-RA	4	-0.254952	0.541619	0.039475
1641489_at	CG33169	CG33169-RA	4	-0.156499	0.755014	0.00215285
1637055_s_at	NA	Transposon.52	4	-0.0478356	0.564242	0.000785933
1629640_at	CG9843	CG9843-RA	4	-0.221436	1.2178	0.000860538
1623760_at	Ugt86De	CG6653-RA	4	-0.289644	1.7446	0.00622369
1625153_at	CG33105	CG33105-RA	4	-0.0912335	0.608341	0.00441826
1623468_at	CG2213	CG2213-RA	4	-0.0195686	0.721429	0.0178186
1625665_at	mRpL5	CG17166-RA	4	0.0509402	0.751157	0.0257381
1624463_s_at	NA	CG3307-RC	4	0.189931	1.05686	0.0158005
1629806_a_at	CG32103	CG32103-RB	4	0.167193	0.768686	0.011141
1635531_at	rost	CG9552-RA	4	0.0605461	0.670552	0.00915133
1633189_at	CG13646	CG13646-RA	4	0.0736561	1.09482	0.0177162
1624655_at	CG6472	CG6472-RA	4	0.0866146	0.672674	0.0141828
1639938_at	CG12272	CG12272-RA	4	0.144481	0.920533	0.0117429
1631198_at	Rs1	CG2173-RA	4	0.034023	0.52433	0.0273173
1639205_s_at	tra2	CG10128-RC	4	0.0504344	0.645803	0.0226019
1638634_at	CG32448	CG32448-RA	4	-0.0956698	0.621464	0.0020035
1628162_at	CG9757	CG9757-RA	4	-0.28009	0.808922	0.012572
1633196_at	Est2	CG2505-RA	4	-0.177256	0.870657	0.00209335
1637828_a_at	sif	CG5406-RB	4	-0.303975	1.10889	0.00172737
1630214_a_at	CG7824	CG7824-RA	4	-0.0775711	0.473564	0.0256655
1633020_at	NA	CG4620-RA	4	0.0345827	0.588978	0.0194912
1639856_at	CG5727	CG5727-RA	4	-0.0664432	0.564144	0.000828188
1636591_at	skpB	CG8881-RA	4	-0.255208	1.23189	1.05701e-06
1624285_at	CG3088	CG3088-RA	4	-0.0959384	0.417959	0.00222254
1630524_at	NA	LP09564	4	-0.143587	0.941642	0.000576507
1630596_at	CG14643	CG14643-RA	4	-0.218476	1.05664	0.00587499
1631680_a_at	CG31878	CG31878-RB	4	-0.273056	1.12481	0.00117426
1623689_a_at	CG14642	CG14642-RA	4	0.0225698	0.87859	0.0108085
1624928_at	CG6064	CG6064-RA	4	-0.0962691	0.843844	0.00151278
1624663_a_at	achi /// vis	CG8821-RA	4	-0.10947	0.618381	0.00820869
1637539_a_at	hbs	CG7449-RA	4	-0.0490294	0.658396	0.0197507
1637862_at	CG6654	CG6654-RA	4	-0.125517	0.728172	0.00229682
1641412_at	NA	CG31809-RA	4	0.137794	1.64744	0.00279964
1626392_s_at	Mef2	Transposon.2	4	-0.0547394	0.713845	1.62899e-05
1632141_at	CG18265	CG18265-RA	4	-0.108686	1.87142	0.00026491
1629029_at	CG5160	CG5160-RA	4	0.0211398	0.801803	0.000976353
1623903_at	NA	CG18473-RA	4	-0.123883	0.971954	5.7169e-06
1635074_s_at	NA	HDC03722	4	-0.0666704	2.63684	1.56631e-05
1631473_at	CG33169	CG33169-RB	4	-0.0487622	0.54386	0.000104862
1637535_at	NA	RH05583	4	-0.0704436	1.56687	0.000126596
1625016_at	NA	CG31516-RA	4	-0.0591007	2.97647	2.20064e-05
1625314_at	CG2022	CG2022-RA	4	0.0346924	1.53845	1.86478e-05
1634988_a_at	CG17352	CG17352-RA	4	-0.0201956	0.847881	9.52183e-05
1633840_a_at	CG8026	CG8026-RB	4	0.130237	0.520055	0.00260161
1636953_a_at	Lmpt	CG32171-RB	4	0.1135	0.575911	0.000631173
1632645_at	CG13330	CG13330-RA	4	0.0457421	0.52475	0.0211283
1636950_at	CG11077	CG11077-RA	4	0.115887	0.534698	0.00965512
1625782_at	CG14010	CG14010-RA	4	0.122735	0.505243	0.00568847
1635798_a_at	CG17364	CG17364-RA	4	0.264868	1.48446	0.000138646
1634279_at	CG11529	CG11529-RA	4	-0.0952485	1.01148	0.0047399
1623486_at	CG7900	CG7900-RA	4	0.0984187	1.3878	0.00131245
1632021_at	Cyp6a20	CG10245-RA	4	0.107603	2.28706	7.40325e-06
1637874_at	NA	CG3849-RA	4	0.375692	2.3867	1.92249e-07
1627131_at	spt4	CG12372-RA	4	0.177862	1.63574	5.97985e-05
1638021_at	CG4757	CG4757-RA	4	0.566222	4.36358	2.63212e-06
1625276_a_at	Eip71CD	CG7266-RC	4	0.0582236	0.595332	0.00061915
1637794_at	CG4927	CG4927-RA	4	-0.135423	1.40788	0.0259258
1634148_at	CG4842	CG4842-RA	4	-0.100177	0.469467	0.00166789
1630038_at	pyd3	CG3027-RA	4	-0.0550394	0.835495	0.000974823
1631307_at	CG11438	CG11438-RA	4	0.0489649	0.925871	0.00301905
1633377_at	NA	CG40303-RA	4	-0.0861398	0.490721	0.00280879
1627007_at	CG4306	CG4306-RA	5	0.0550393	0.98064	0.0325901
1625571_at	CG5385	CG5385-RA	5	0.20077	0.755635	0.00958882
1635987_at	CG12116	CG12116-RA	5	0.143399	0.563043	0.030958
1625947_at	NA	CG4604-RA	5	0.0956546	0.671199	0.0171067
1625503_at	CG32425	CG32425-RB	5	0.325236	0.7221	0.0346647
1624057_at	CG16713	CG16713-RA	5	0.263303	0.66487	0.0274913
1624895_at	CG7529	CG7529-RA	5	0.40622	1.2366	0.00475442
1627460_at	CG18343	CG18343-RA	5	0.601746	3.16817	0.000793919
1627116_at	CG18316	CG18316-RA	5	0.0906932	0.521352	0.00876804
1623900_a_at	CG14935	CG14935-RA	5	0.194377	0.769571	0.00297201
1634048_a_at	bgm	CG4501-RB	5	0.133292	0.731278	0.00579515
1635318_at	Odc1	CG8721-RA	5	0.470219	1.61407	0.00942634
1624888_at	CG7081	CG7081-RA	5	0.198213	0.64039	0.0239249
1623360_at	CG32534	CG32534-RA	5	0.181145	0.548338	0.0355633
1623923_a_at	gl	CG7672-RB	5	0.505678	0.441114	0.0399927
1629217_at	CG31258	CG31258-RA	5	0.33027	0.58736	0.0218196
1632392_s_at	Slob	CG6772-RB	5	0.178511	0.51521	0.0184439
1626813_at	NA	CG16725-RA	5	0.410131	0.743989	0.0365811
1631349_s_at	NA	Transposon.49	5	0.878379	1.38488	0.00226626
1640335_at	CG31304	CG31304-RA	5	0.252616	0.572159	0.0234685
1624901_at	CG9272	CG9272-RA	5	0.316584	0.835859	0.0089605
1635188_at	NA	CG6675-RA	5	0.27415	0.588233	0.0196946
1638211_at	CG10933 /// CG10934	CG10933-RA	5	0.344691	0.563168	0.021744
1638202_at	CG12524	CG12524-RA	5	0.242493	0.580935	0.0354884
1629027_at	CG14662	CG14662-RA	5	0.379408	1.04566	0.0233282
1626984_at	Gld	CG1152-RA	5	0.231775	0.616267	0.0170986
1630503_at	CG6045	CG6045-RA	5	0.246689	0.63516	0.00806314
1633471_at	CG12896 /// Prx2540-2	CG11765-RA	5	0.561608	1.32976	0.000122386
1629194_s_at	ade2	CG9127-RA	5	0.52339	1.28131	0.00041537
1633684_at	CG32444	CG32444-RA	5	0.627843	1.51255	0.000792748
1634794_at	CG10924	CG10924-RA	5	0.691341	1.45836	0.00217669
1638238_at	CG5778	CG5778-RA	5	0.521974	0.988327	0.00931908
1626473_a_at	CG15825	CG15825-RB	5	0.387046	0.603356	0.0322375
1636296_at	CG12945	CG12945-RA	5	0.381179	0.535911	0.0277107
1624236_at	CG1773	CG30002-RA	5	0.696718	0.882154	0.0497965
1630236_s_at	CG15093	CG15093-RC	5	0.526449	0.555747	0.0469243
1638772_at	NA	CG18107-RA	5	0.358252	0.657494	0.0449996
1634762_a_at	CG15096	CG15096-RA	5	0.728971	1.03277	0.00807046
1634890_at	NA	CG15261-RA	5	0.919578	1.22	0.0249535
1640594_at	CG3011	CG3011-RA	5	0.408777	0.624619	0.0344
1625174_at	CG15067	CG15067-RA	5	0.517839	0.81721	0.0138384
1641681_s_at	CG5288	CG5288-RA	5	0.662911	0.989184	0.037391
1634551_at	CG6188	CG6188-RA	5	1.02617	1.88077	0.0183982
1635060_at	CG15068	CG15068-RA	5	0.391989	0.728423	0.0133182
1640202_at	Idgf2	CG4475-RA	5	0.479521	0.883274	0.0197846
1623364_at	CG4250	CG4250-RA	5	0.631497	1.02605	0.0177312
1639424_at	CG6910	CG6910-RA	5	0.345734	0.546364	0.0226097
1636688_at	Cyp4s3	CG9081-RA	5	0.724025	1.05231	0.00483645
1640144_at	CG18067	CG18067-RA	5	0.826757	1.33969	0.000529902
1623669_at	CG16836	CG16836-RA	5	1.2751	2.02495	0.0014012
1629530_at	NA	CG15066-RA	5	1.01215	1.46984	0.00325558
1630520_s_at	NA	RH09485	5	0.816092	1.3333	0.00253391
1625474_s_at	CG1441	CG1441-RA	5	0.44788	0.505073	0.0369739
1639442_a_at	NA	CG6186-RB	5	0.954778	1.06419	0.0198359
1633053_at	NA	CG18108-RA	5	0.890043	1.20819	0.00333941
1639019_s_at	CG18279	Dm.2R.12921.0	5	0.899984	1.16716	0.00527025
1627271_at	CG7655	CG13422-RA	5	1.09788	1.25218	0.00887141
1637229_a_at	CG11796	CG11796-RA	5	0.969058	1.13444	0.00597756
1635189_at	NA	CG10810-RA	5	3.00073	3.08962	0.000107361
1635273_s_at	NA	CG12199-RC	5	3.55203	3.69723	2.17046e-08
1626266_at	MAGE	CG10059-RA	5	0.741208	0.877159	0.00234909
1631370_at	CG30026	CG30026-RA	5	1.02568	1.14564	0.00433853
1638696_a_at	CG3552	CG3552-RA	5	1.09148	1.55711	0.0372699
1633208_at	NA	CT32625	5	1.32418	1.93691	0.0006052
1636932_at	CG9886	CG9886-RA	5	0.654145	1.01766	0.00304678
1622893_at	CG14206 /// CG16844	CG16844-RA	5	0.526871	0.806547	0.000378798
1640360_at	NA	CG18106-RA	5	0.679397	0.984875	0.000302027
1632430_at	NA	CG6186-RA	5	0.764582	0.851696	6.3406e-05
1626345_at	NA	CG15231-RA	5	0.918025	1.26056	0.00135366
1628639_at	NA	CG5791-RA	5	1.441	2.30924	6.48041e-05
1631660_at	CG15065	CG15065-RA	5	0.98458	1.40596	0.000236865
1624543_s_at	CG5976	Transposon.32	5	0.792479	1.02365	0.000267396
1626319_a_at	CG18279	CG18279-RB	5	0.783782	1.07694	3.78236e-05
1634318_at	NA	CG33110-RA	5	0.676272	1.01536	0.000114223
1637587_at	CG16716	CG16716-RB	5	0.883118	0.746904	0.0297719
1632656_at	CG12112	CG12112-RA	5	0.858251	0.879958	0.00313826
1623679_at	CG4789	CG4789-RB	5	0.624927	0.561815	0.00718765
1639498_a_at	ap	CG8376-RB	5	0.576372	0.538264	0.0210409
1639851_at	CG13069	CG13069-RA	5	0.784217	0.693587	0.00533409
1625727_at	NA	CG32006-RA	5	0.501871	0.516566	0.0296842
1625124_at	NA	CG10146-RA	5	0.91821	0.984554	0.0485828
1626123_at	NA	CT35121	5	0.550523	0.415059	0.0260275
1634674_at	CG9989	CG9989-RA	5	2.37193	1.95507	0.00486407
1625840_at	CG12001	CG12001-RA	5	1.60048	1.30625	0.0142407
1637275_a_at	CG13335	CG13335-RA	5	2.47432	2.14177	0.00677964
1627556_at	CG15639	CG15639-RA	5	0.529648	0.328803	0.0162382
1627507_at	CG5704	CG5704-RA	5	0.898787	0.540102	0.00779674
1627551_s_at	NA	CG18372-RA	5	1.24224	0.903927	0.0227638
1638235_at	NA	CG10794-RA	5	3.87857	2.64927	0.000395471
1641419_at	NA	CG4740-RA	5	3.46814	2.49728	0.00115976
1627613_at	NA	CG8175-RA	5	1.69966	1.28231	0.0147099
1636330_at	CG17107	CG17107-RA	5	0.947449	0.638356	0.0367184
1631691_at	CG16772	CG16772-RA	5	0.539529	0.476581	0.0179679
1625613_at	CG11899	CG11899-RA	5	0.709269	0.510739	0.0469248
1635548_s_at	CG15281	CG15281-RA	5	1.70463	0.871616	0.0095225
1628386_at	NA	CT33317	5	0.844719	0.460257	0.0210784
1629398_at	CG10383	CG10383-RA	5	0.652809	0.309064	0.0214189
1637838_at	CG31640	CG31640-RA	6	0.0343156	-0.609168	0.0390065
1627367_at	CG5653	CG5653-RA	6	-0.0190397	-0.663311	0.0153705
1629906_s_at	NA	CG33045-RA	6	0.227878	-0.646385	0.00496611
1629014_s_at	CG2604	CG2604-RC	6	0.128231	-0.517022	0.00847965
1632980_at	CG3902	CG3902-RA	6	0.167362	-0.732261	0.0045337
1625707_s_at	Ccp84Aa /// Ccp84Ab	CG2360-RA	6	0.0949196	-0.408863	0.0296383
1640224_s_at	CG13796	CG13796-RB	6	0.00561251	-0.494763	0.00283349
1632431_s_at	Ance	CG8827-RA	6	0.0689623	-0.44099	0.00150264
1623216_s_at	CG9629	CG9629-RA	6	0.0806486	-0.442032	0.00716089
1633592_a_at	NA	CG5413-RB	6	0.0469807	-0.623622	0.00267321
1637548_at	NA	CG18104-RA	6	0.134592	-1.23902	0.0232093
1625164_at	NA	CG31193-RA	6	-0.00945147	-0.800409	0.0445053
1629061_s_at	Hsp67Bb	CG32041-RB	6	0.031121	-0.575921	0.0174206
1630957_s_at	slif	CG11128-RA	6	0.122349	-0.39426	0.0255518
1637997_at	CG32155	CG32155-RA	6	0.165255	-0.781864	0.0110403
1638858_at	CG8934	CG8934-RA	6	0.124242	-0.415178	0.0369525
1635507_at	CG4269	CG4269-RA	6	0.0751013	-0.513496	0.0141306
1626456_at	CG32701	CG32701-RA	6	0.261255	-0.4703	0.0284398
1637145_at	CG14787	CG14787-RA	6	0.102951	-0.707226	0.0185202
1632106_at	CG9747	CG9747-RA	6	0.132201	-0.456688	0.0021905
1631962_at	NA	CG33192-RA	6	0.285484	-0.718648	0.0037004
1632860_at	CG15006	CG15006-RA	6	0.18565	-0.712865	0.00279547
1624069_at	NA	CG7296-RA	6	0.0854555	-0.497481	0.000258718
1631217_a_at	TpnC73F	CG7930-RA	6	0.240656	-0.985843	0.000730651
1639694_s_at	CG10102 /// CG12505	CG10102-RA	6	0.809092	-1.25085	0.000802261
1637939_at	Spn43Aa	CG12172-RA	6	0.415377	-1.17176	0.00376961
1626439_at	NA	CG15353-RA	6	0.105739	-0.432719	0.00137864
1640103_s_at	CG17224	CG17224-RA	6	0.0300124	-0.6717	0.00213842
1641365_s_at	NA	SD27140	6	0.356773	-1.45388	1.58756e-06
1634351_at	CG7860	CG7860-RA	6	0.238363	-0.732818	0.000748654
1623565_at	NA	CG17278-RA	6	0.118909	-0.470297	0.000885338
1633206_at	CG9780	CG9780-RA	6	0.311372	-0.770984	0.00302605
1637900_at	CG11852	CG11852-RA	6	0.294001	-0.922355	6.4689e-05
1637385_a_at	CG9780	CG9780-RA	6	0.316115	-0.459771	0.000435865
1623706_at	CG9498	CG9498-RA	6	0.239951	-0.433822	0.00704029
1641228_a_at	CG33098	CG33098-RC	6	0.330431	-0.486106	0.00800754
1624362_at	Nplp4	CG15361-RA	6	0.216215	-0.318649	0.0333166
1633653_at	CG8647	CG8647-RA	6	0.362432	-0.517698	0.0288211
1630342_s_at	CG3631	CG3631-RA	6	0.307855	-0.243966	0.0316451
1634458_at	CG31635	CG31635-RA	6	0.290874	-0.261342	0.0360152
1631628_s_at	CG12896 /// Prx2540-2	CG11765-RA	6	0.313794	-0.345131	0.00591671
1626086_at	CG10621	CG10621-RA	6	0.566316	-0.242908	0.0376716
1634374_at	CG33138	CG33138-RA	6	0.327799	-0.280792	0.0391377
1634302_s_at	CG14516	CG14516-RB	6	0.397976	-0.280264	0.0264302
1625649_s_at	NA	Transposon.83	6	0.310281	-0.342532	0.0334559
1629726_at	CG10472	CG10472-RA	6	1.22594	-0.828701	0.0142345
1625374_at	CG9466	CG9466-RA	6	0.430815	-0.471599	0.0318625
1639401_at	LvpH	CG8696-RA	6	0.490376	-0.379084	0.00997182
1630934_at	NA	Transposon.30	6	0.758329	-1.08384	0.000386176
1624650_at	CG33087	CG33087-RC	6	0.272889	-0.290554	0.0117233
1639374_s_at	Amy-d	CG18730-RA	6	0.487726	-0.719348	0.000611062
1633959_s_at	NA	Transposon.10	6	0.763542	-0.666924	5.74978e-05
1641539_a_at	CG7829	CG7829-RB	6	1.65719	-1.02179	6.45854e-06
1632209_at	CG7829	CG7829-RA	6	1.30523	-1.03962	1.67749e-05
1629181_at	NA	LP10657	6	0.425512	-0.341903	0.00265616
1638872_at	Hsp68	CG5436-RA	6	0.410375	-0.425444	0.000346117
1626830_at	CG6044	CG11650-RA	6	0.361893	-0.304539	0.0407876
1639502_at	CG8942	CG8942-RA	6	0.398814	-0.325677	0.0485377
1635512_at	CG11893	CG11893-RA	6	1.5404	-0.908291	0.00299794
1629822_a_at	CG15506	CG15506-RA	6	0.325433	-0.332601	0.00276955
1635140_at	NA	CG15515-RA	6	0.509804	-0.347394	0.0119094
1637067_at	CG6074	CG6074-RA	6	0.648605	-0.304353	0.0300574
1624800_at	CG5224	CG5224-RA	6	0.411923	-0.216601	0.0370858
1641320_s_at	CG3168	CG3168-RC	6	0.392619	-0.116744	0.0221274
1634567_at	gce	CG6211-RA	6	0.477353	-0.130748	0.0392876
1640897_at	sip3	CG1937-RA	6	0.34551	-0.204319	0.00798192
1628629_at	CG30038	CG30038-RA	6	0.374191	-0.204028	0.00262583
1637517_s_at	KrT95D	CG5405-RB	6	0.462816	-0.207915	0.000789827
1639232_s_at	SP1029	CG11956-RA	6	0.759091	-0.281581	0.000153002
1640711_at	CG30350	CG30350-RA	6	0.34338	-0.199844	0.0203056
1624179_at	NA	CG31680-RA	7	0.82088	-0.24192	0.041075
1633109_at	CG16971	CT37659	7	0.613709	-0.0319166	0.0409404
1626530_at	CecB	CG1878-RA	7	0.826327	0.0509195	0.0164732
1638286_at	pie	CG5354-RA	7	0.519736	0.0760772	0.014476
1629551_s_at	CG12268	CG12268-RA	7	0.523535	-0.00426532	0.0280488
1633307_at	CG13720	CG13720-RA	7	0.681841	0.0269891	0.0231195
1636853_at	CG13214	CG13214-RA	7	0.462031	-0.128057	0.00203396
1623761_at	CG15347	CG15347-RA	7	0.816878	-0.170383	0.00173396
1624699_s_at	Bx	CG6500-RA	7	1.94106	-0.224654	0.000669619
1641207_s_at	CG4991	CG4991-RB	7	0.552238	-0.000295762	0.0014523
1638358_s_at	Bx	S.CX002085	7	2.05522	-0.646312	9.27814e-05
1635277_at	NA	HDC11615	7	0.40055	-0.104856	0.00401668
1637963_at	NA	CG14191-RA	7	0.528236	-0.200008	0.00220838
1633825_at	CG14221	CG14221-RA	7	1.15305	-0.035028	0.00185503
1636194_s_at	NA	HDC02744	7	2.59292	-0.0145242	0.000993779
1629362_at	NA	CG32475-RA	7	0.990507	-0.0233372	0.00354675
1635447_at	CG4827	CG4827-RA	7	0.649407	-0.0237705	0.0025846
1638862_at	CG15553	CG15553-RA	7	1.42884	0.262569	0.000455933
1625648_at	CG3868	CG3868-RA	7	0.543285	0.0370485	0.000303338
1626088_at	CG2177	CG2177-RA	7	3.02639	0.136015	0.00112834
1640658_at	NA	CG10005-RA	7	0.610805	-0.0390416	0.000611036
1628314_a_at	CG6891	CG6891-RA	7	0.913099	-0.163821	0.00222921
1638246_at	NA	CG5804-RA	7	1.63701	-0.188339	0.000388233
1633386_s_at	NA	CT37020	7	2.65576	-0.107047	3.46147e-06
1637158_at	NA	S.CX001534	7	0.67159	-0.0113114	5.05055e-07
1628622_s_at	CG3409	S.C2R000135	7	0.590602	-0.03837	0.000223857
1629835_at	CG5048	CG5048-RA	7	0.657457	0.285042	0.0399888
1640978_at	CG14567	CG14567-RA	7	0.808224	0.124861	0.0175938
1640857_at	CG10208	CG10208-RA	7	0.489362	-0.0340717	0.0234816
1640473_at	CG1819	CG1819-RA	7	0.475108	-0.116752	0.00445905
1625995_a_at	Zw	CG12529-RA	7	0.45879	-0.0720533	0.028549
1627910_s_at	CG8036	CG8036-RB	7	0.486263	-0.0788328	0.0273383
1626689_at	Cyp6t1	CG1644-RA	7	1.10787	0.0485282	0.0263234
1636170_at	CG13607	CG13607-RA	7	1.07743	0.237729	0.0392781
1636271_a_at	CG33066	CG33066-RC	7	0.710365	0.151766	0.0158125
1625683_at	CG5112	CG5112-RA	7	0.52419	0.186802	0.0288644
1633337_at	CG17386	CG17386-RA	7	1.30504	0.554193	0.0120537
1637936_at	NA	CG32512-RA	7	0.659749	0.169226	0.0145771
1638812_at	NA	CG11501-RA	7	3.02502	0.277983	0.0124109
1623635_at	NA	CG14027-RA	7	6.02783	2.13062	0.013803
1639323_at	NA	CG31508-RA	7	3.48242	1.20781	0.00352435
1628688_at	CG12054	CG12054-RA	7	0.662539	0.105135	0.00187618
1636258_at	CG8550	CG8550-RA	7	0.896215	-0.116823	0.00232133
1626162_s_at	CG1906	CG1906-RA	7	0.786104	0.0718694	0.00303633
1632693_at	Lcp65Ac	CG6956-RA	7	0.715513	0.0982556	0.0046427
1632003_a_at	Ptp99A	CG2005-RB	7	1.01048	0.0186549	0.00337267
1639660_s_at	CG10550	CG10550-RB	7	1.0349	0.108698	0.000162195
1634271_at	NA	CG1385-RA	7	0.760262	0.204651	0.00400721
1630067_a_at	NA	CG7052-RA	7	0.67987	0.0482592	0.00578059
1630375_at	CG7635	CG7635-RA	7	1.01661	0.410845	0.025091
1639727_at	CG7601	CG7601-RA	7	0.521664	0.214245	0.0179229
1635744_at	CG9342	CG9342-RA	7	0.543719	0.174148	0.0351828
1636490_at	PGRP-SB1	CG9681-RA	7	1.34701	0.568788	0.00459462
1635269_at	NA	CG5435-RA	7	0.605695	-0.029865	0.0012615
1639418_at	NA	CG10297-RA	7	0.754239	-0.0297814	0.00558714
1635549_at	NA	CG31509-RA	7	2.26914	0.106649	0.0147393
1627854_at	CG9914	CG9914-RA	7	1.48176	0.140159	0.0032591
1636196_s_at	CG6891 /// CG6900	CG6900-RA	7	0.944521	0.00604836	0.00237632
1636889_at	NA	HDC20515	7	0.656797	0.117538	0.0120802
1640425_at	CG32655	CG32655-RA	7	0.871227	0.112335	0.0294101
1634882_at	NA	CG10852-RA	7	2.93903	0.309162	0.0462015
1627178_at	Acp62F	CG1262-RA	7	3.27071	0.327498	0.0190458
1632185_s_at	scpr-A /// scpr-B /// scpr-C	CG5207-RA	7	2.79856	0.344774	0.0467415
1635724_at	CG14292	CG14292-RA	7	2.78541	0.494628	0.0102844
1641610_at	CG7874	CG7874-RA	7	1.90964	0.270364	0.0464876
1636784_at	NA	CG9334-RA	7	3.65159	0.74078	0.0243028
1638714_at	Acp26Aa	CG8982-RA	7	2.85517	0.503094	0.0400506
1638838_at	CG13030	CG13030-RA	7	0.496201	-0.0297352	0.0194579
1628383_at	CG3330	CG3330-RA	7	1.29511	0.167711	0.0217036
1630353_at	NA	CG31178-RA	7	1.38903	-0.104436	0.018261
1636583_at	CG5932	CG5932-RA	7	1.03314	-0.00767459	0.0100682
1629520_at	CG8997	CG8997-RA	7	1.20689	-0.0590334	0.00852785
1627393_at	CG9029	CG9029-RA	7	2.54901	-0.523102	0.0245846
1624202_a_at	CG2127	CG2127-RA	7	2.30887	0.0529784	0.0283456
1637276_at	Pen	CG4799-RA	7	2.76807	-0.290372	0.0329059
1628908_at	CG5075	CG5075-RA	7	0.414741	-0.0884649	0.0390177
1639425_at	CG18662	CG18662-RA	7	1.36456	-0.479862	0.0320299
